# Supplementary material for: Association of Rs12997 Variant in the Acvr1 Gene: A Member of Bone Morphogenic Protein Signaling Pathway with Primary Open-Angle Glaucoma in a Saudi Cohort
Source: HighWire-hosted journal article supplement (doi:10.1136/jim-2020-001596), 2020-12-23
Supplement: jim-2020-001596supp001_data_supplement.pdf [file jim-2020-001596supp001_data_supplement.pdf]

**Supplementary Fig. 1:** Genotype effect of rs12997 and rs1043784 on glaucoma specific clinical indices in PAOG cases. (A) intraocular pressure (IOP) (B) cup/disc ratio and (C) number of antiglaucoma medications

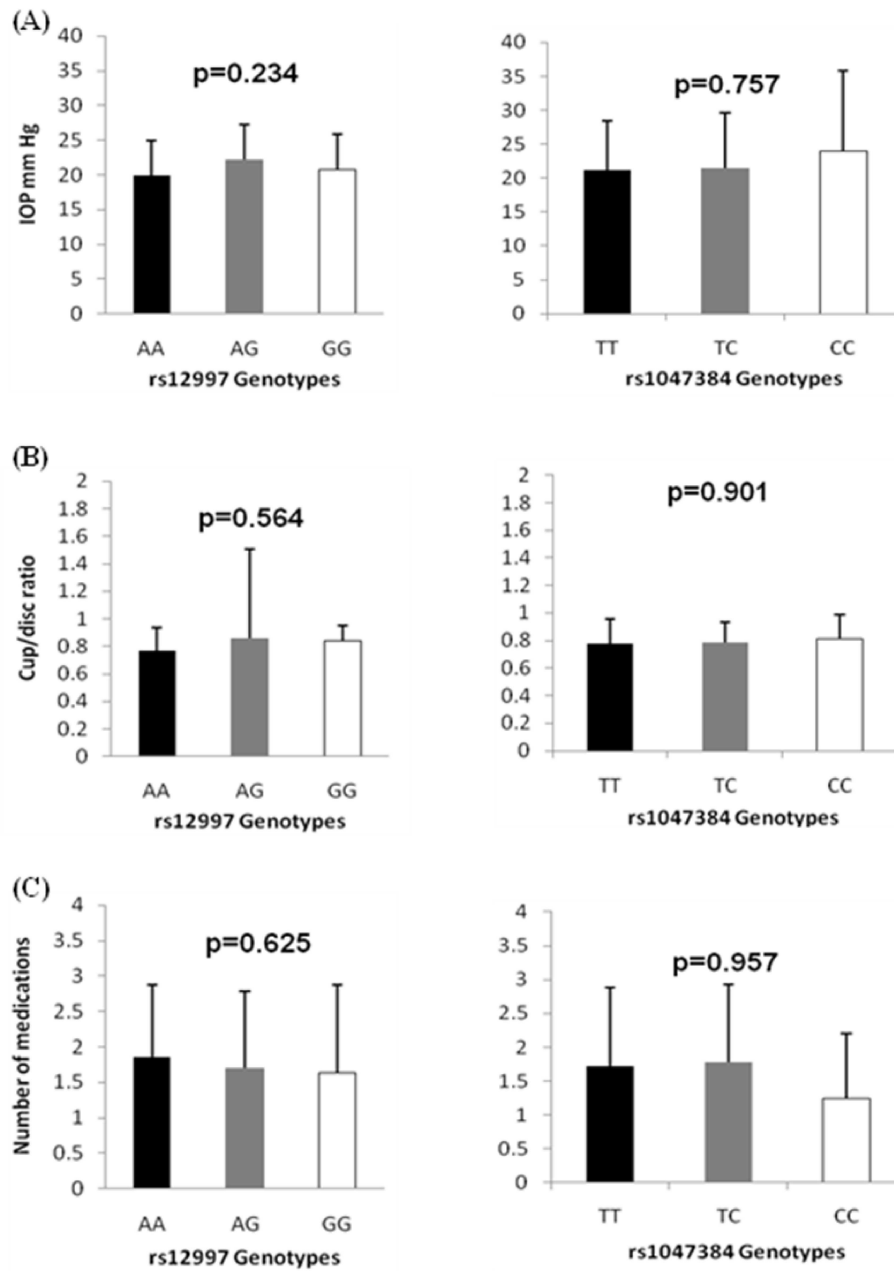

**Supplementary Table 1: Binary logistic regression analysis to determine the effect age, sex and polymorphisms on POAG risk**

| Variables | B      | SE    | Wald  | Odds ratio (95% confidence interval) | p-value      |
|-----------|--------|-------|-------|--------------------------------------|--------------|
| Age       | 0.024  | 0.013 | 3.642 | 1.02 (0.99 – 1.05)                   | 0.056        |
| Sex       | -0.114 | 0.217 | 0.275 | 0.90 (0.58 – 1.36)                   | 0.600        |
| Rs12997   |        |       | 4.573 |                                      | 0.102        |
| A/G       | 0.230  | 0.233 | 0.973 | 1.26 (0.78 – 1.99)                   | 0.324        |
| G/G       | 0.723  | 0.340 | 4.534 | <b>2.06 (1.06 – 4.01)</b>            | <b>0.033</b> |
| Rs1043784 |        |       | 0.251 |                                      | 0.882        |
| T/C       | -0.021 | 0.257 | 0.007 | 0.98 (0.59 – 1.62)                   | 0.936        |
| C/C       | -0.313 | 0.626 | 0.250 | 0.73 (0.21 – 2.50)                   | 0.617        |
| Constant  | -2.190 | 0.804 | 7.422 | 0.11                                 | 0.006        |

Note: Significant odds ratio and p-value in bold
